# Supplementary material for: FRET probe for detecting two mutations in one EGFR mRNA
Source: Royal Society of Chemistry journal article supplement (doi:10.1039/d3an00554b), 2023-01-01
Supplement: d3an00554b1.pdf [file d3an00554b1.pdf]

## Supplementary Information for

### **FRET probe for detecting two mutations in one EGFR mRNA**

Myat Thu,<sup>a</sup> Kouta Yanai,<sup>a</sup> Hajime Shigeto,<sup>b</sup> Shohei Yamamura,<sup>b</sup> Kazunori Watanabe<sup>a</sup> and Takashi Ohtsuki <sup>\*a</sup>

<sup>a</sup> *Department of Interdisciplinary Science and Engineering in Health Systems, Okayama University, Okayama, Japan.*

<sup>b</sup> *Health and Medical Research Institute, National Institute of Advanced Industrial Science and Technology (AIST), 2217-14 Hayashi-cho, Takamatsu, Kagawa 761-0395, Japan*

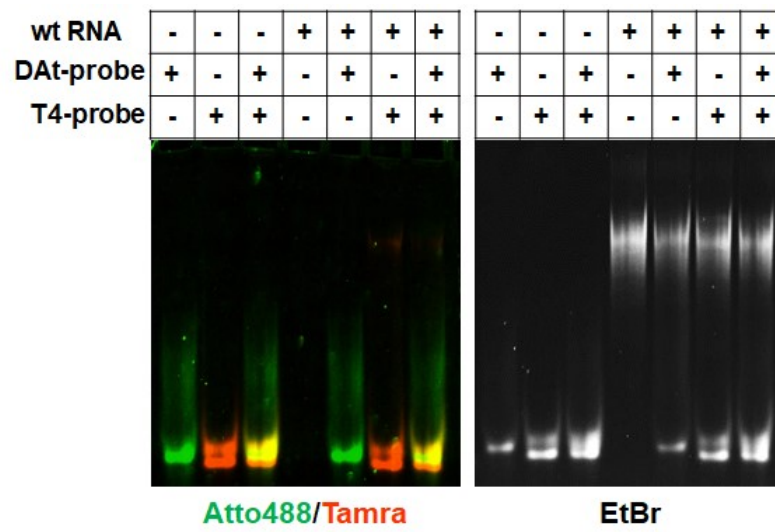

**Figure S1.** Confirmation of the wt RNA binding of DAt- and T4-probes by 8 % denatured PAGE. In the left panel, Atto488 is shown in green and Tamra in orange. In the right panel, nucleic acids are stained with ethidium bromide.

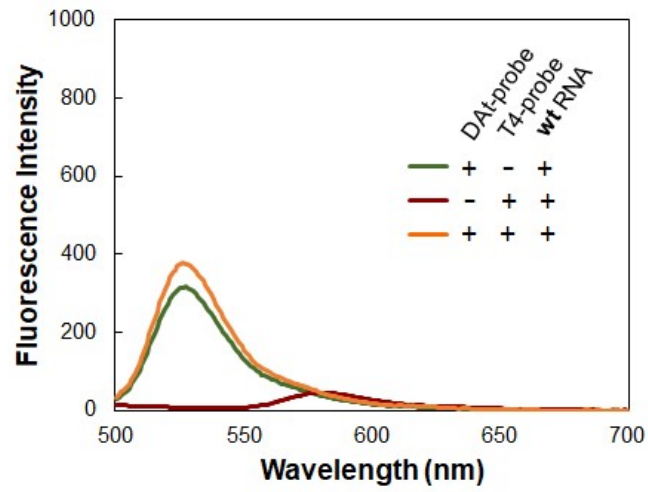

**Figure S2.** Fluorescence spectra of DAT- and T4-probes with wt RNA.

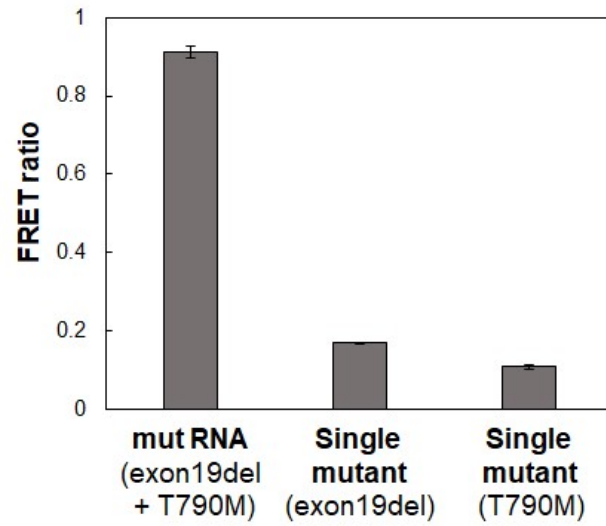

**Figure S3.** FRET ratios using the DAT-/T4-probe with double mutant RNA (mut RNA) or single mutant RNA. The data are presented as mean  $\pm$  SEM; n = 3.

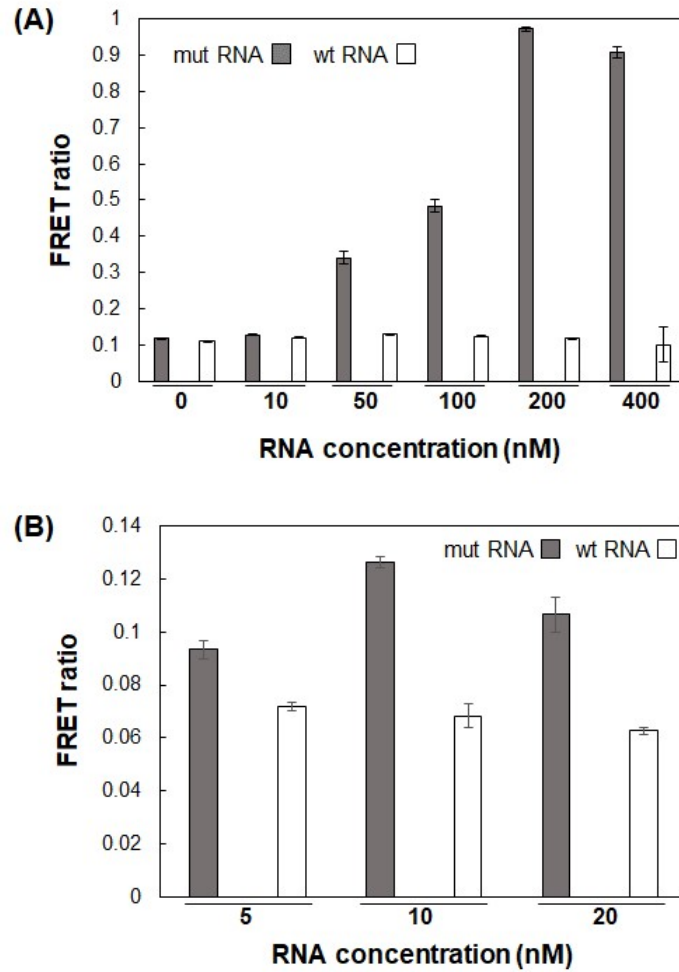

**Figure S4.** FRET ratios using the DAt-/T4-probe with mut or wt RNA at various concentrations. (A) The probes (200 nM) and RNA were mixed and incubated at 37 °C for 60 min. (B) The probes (10 nM) and RNA were mixed and incubated at 37 °C for 60 min. The data are presented as mean  $\pm$  SEM; n = 3.
